# Supplementary material for: A single crystal derived precursor for improving the performance of CsSnI3 perovskite solar cells
Source: Royal Society of Chemistry journal article supplement (doi:10.1039/d3ta02892e), 2023-01-01
Supplement: d3ta02892e1.pdf [file d3ta02892e1.pdf]

## Supporting Information

### **Single crystal derived precursor for improving performance of CsSnI<sub>3</sub> perovskite solar cells**

Qiang Sun<sup>a, ‡</sup>, Anjie Gu<sup>a, ‡</sup>, Haixuan Yu<sup>a</sup>, Yan Shen<sup>a</sup> and Mingkui Wang<sup>\*a</sup>

<sup>a</sup> Wuhan National Laboratory for Optoelectronics, Huazhong University of Science and Technology, 1037 Luoyu Road, Wuhan 430074, Hubei, P. R. China.

<sup>‡</sup> These authors contributed equally to this work.

\*Corresponding author: [mingkui.wang@mail.hust.edu.cn](mailto:mingkui.wang@mail.hust.edu.cn)

## Material and methods

### Material:

CsI (99.99%, Sigma Aldrich), SnI<sub>2</sub> (99.99%, Sigma Aldrich), N, N-Dimethylformamide (DMF, Anhydrous 99.8%, Sigma Aldrich), dimethyl sulfoxide (DMSO, Anhydrous  $\geq 99.5\%$ , Sigma Aldrich), [6,6]-Phenyl C61 butyric acid methyl ester (PCBM,  $>99.5\%$ , Sigma Aldrich) were used as received without further purification. Poly(3,4-ethylenedioxythiophene) polystyrene sulfonate (PEDOT:PSS) and Bathocuproine (BCP) were purchased from Xi'an p-OLED.

### PSC devices fabrication:

ITO glasses were sequentially cleaned in detergent, deionized water, acetone, isopropanol, and alcohol for 20 minutes. Afterward, the glasses were treated with ultraviolet ozone for 30 minutes. PEDOT: PSS films were coated on the cleaned ITO-glasses at 4500 rpm for 40 s and then annealed in air at 145 °C for 20 min. The perovskite film was deposited onto the substrate using a warm (50-60 °C) perovskite precursor solution in the N<sub>2</sub>-filled glovebox. The mixture of CsI and SnI<sub>2</sub> (with a molar ratio of 1: 1) or CsSnI<sub>3</sub> single crystals were dissolved in the mixed solvent of DMF and DMSO (v/v, 9:1) to obtain a 0.8 M solution. The S-CsSnI<sub>3</sub> and/or C-CsSnI<sub>3</sub> films were coated on the HTL by spin-coating the precursor solution at 3000 rpm for 30s. All of the deposited perovskite films were rested for 30 min prior to annealing. The substrates were further annealed at 80 °C for 10 min. The PCBM solution was prepared by dissolving 20 mg PCBM in 1 mL chlorobenzene. 50  $\mu$ L of the PCBM solution was then dropped onto the perovskite films and spin-coated at 2000 rpm for 30 s. A 0.5 mg mL<sup>-1</sup> BCP/anhydrous isopropanol solution was spin-coated at 6000 rpm for 30 s, followed by annealing at 60 °C for 10 min. Finally, a 100 nm Ag electrode was deposited using a thermal evaporator to finish the device fabrication.

### Characterization:

Single-crystal X-ray diffraction (SCXRD) was measured using XtaLAB PRO MM007HF Cu. X-ray diffraction (XRD) experiments were conducted using a Philips

X-ray diffractometer with Cu K $\alpha$  radiation to measure the crystal structure. The film light absorption was measured with a PE950 spectrophotometer at room temperature. The film morphology was obtained with a field-emission scanning electron microscope (FEI Nova Nano SEM 450). The steady-state photoluminescence (PL) spectrum was measured by a fluorescence spectrophotometer (LabRAM HR800). Inductively coupled plasma optical emission spectroscopy (ICP-OES) was measured using Prodigy Plus ICP-OES. X-ray photoelectron spectrometer (XPS) measurements were conducted on an AXIS SUPRA system (Kratos Analytical Ltd.). Time-resolved photoluminescence decays (TRPL) were measured by Delta Flex Fluorescence Lifetime System (Horiba Scientific Com., Japan). The photocurrent density-voltage (J-V) characteristics of the devices were obtained by applying an external potential bias to the devices and measuring the generated photocurrent with a Keithley model 2400 digital source meter.

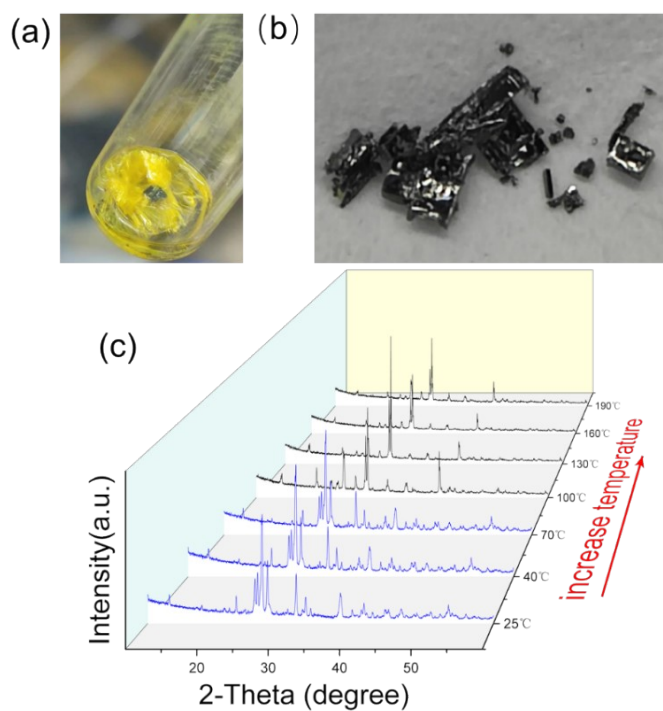

**Figure S1.** The optical images of (a) the yellow needle-like crystals and (b) the black bulk crystals. (c) XRD patterns of the crystals prepared at different temperatures, where the blue lines represent the formation of the Y-CsSnI<sub>3</sub> phase, black lines represent the formation of B-γ CsSnI<sub>3</sub> phase.

At room temperature, this material exists in two polymorphs: the edge-connected 1D double-chain structure (Y-CsSnI<sub>3</sub>, Figure S1a), which is a non-photoactive phase and the corner-linked 3D perovskite structure (B-γ CsSnI<sub>3</sub>, Figure S1b), which is a desirable photoactive phase. Further, we examined the crystal phases grown at a series of temperatures and determined that 100°C is the lowest temperature for the B-γ CsSnI<sub>3</sub> preparation through this method (Figure S1c).

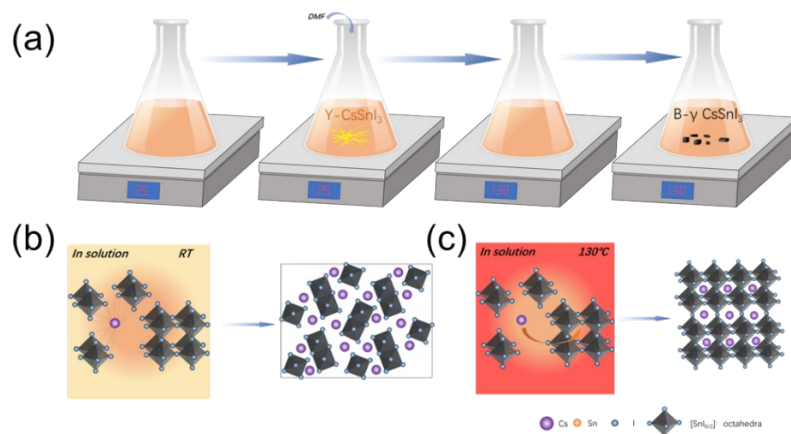

**Figure S2.** (a) Schematic diagram of the synthesis pathways of phase pure Y-CsSnI<sub>3</sub> and B-γ CsSnI<sub>3</sub> single crystals. Crystal growth mechanism of (b) the Y-CsSnI<sub>3</sub> and (c) the B-γ CsSnI<sub>3</sub> crystal structure in the precursor.

The precursors were crystallized once at room temperature and once at 130 °C (Figure S2a). The yellow phase was obtained at room temperature, whose crystal structure was Cs ions surrounded by three adjacent Sn<sub>2</sub>I<sub>6</sub><sup>2-</sup> chains (Figure S2b). In contrast, the black phase was obtained at 130 °C, and its crystal structure was a three-dimensional network structure of [SnI<sub>6/2</sub>]-octahedra stacked by angle sharing, while Cs ions filled into the interstitial positions constructed by the octahedra, constituting a three-dimensional chalcogenide structure (Fig. S2C). It has been reported in the literature that Cs atoms play a key role in determining the phase structure of CsSnI<sub>3</sub>.<sup>[1]</sup> Therefore, this phenomenon of forming different single-crystal structures at different temperatures may be attributed to the following: while at lower temperatures the Cs ions have difficulty crossing the energy barrier into the octahedral gap position and eventually fail to form the perovskite phase; When the solution temperature reaches 130°C, the temperature intensifies the molecular thermal motion of the Cs ions in solution, providing sufficient activation energy to drive the Cs ions into the [SnI<sub>6/2</sub>]-octahedral gap position to form a perovskite structure.

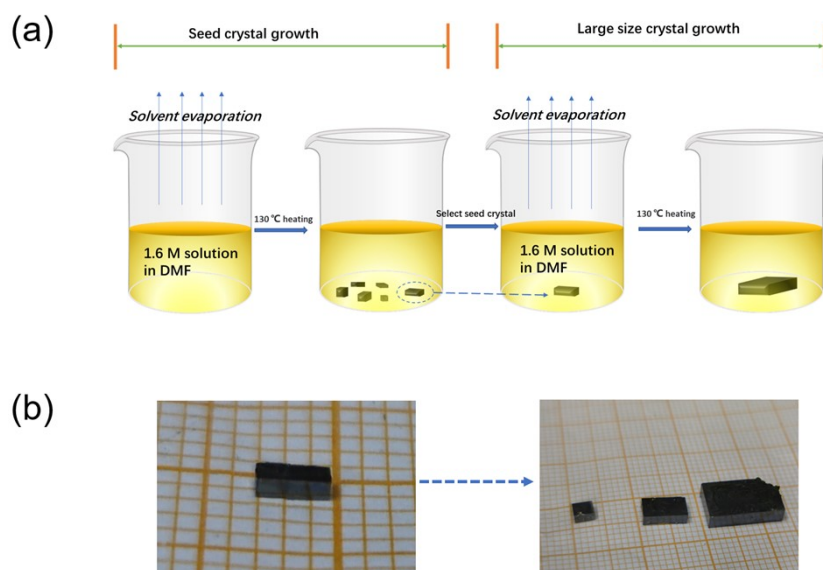

**Figure S3.** (a) Growth method of large-sized single crystals. (b) Optical image of large B- $\gamma$  CsSnI<sub>3</sub> single crystals (each cell represents 1mm).

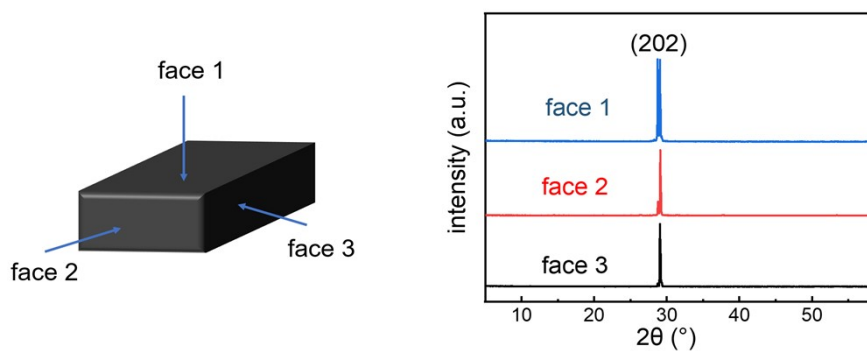

**Figure S4.** (a) XRD of the three exposed surfaces of the CsSnI<sub>3</sub> single crystal.

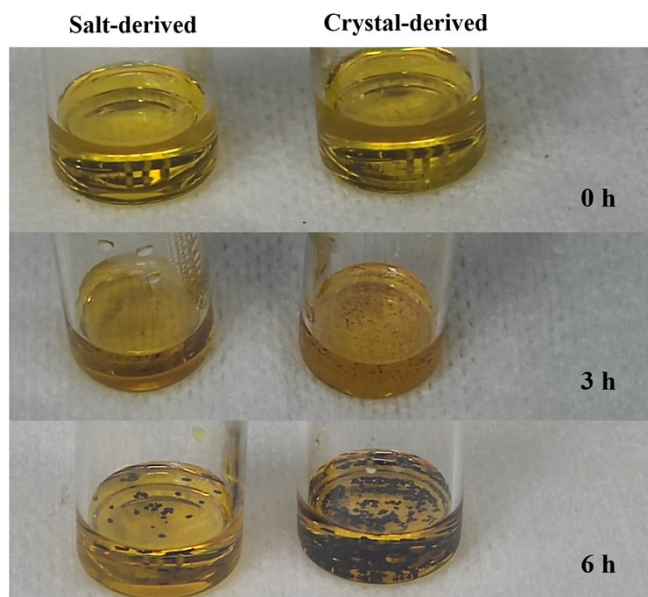

**Figure S5.** Time-varying crystallization products of  $\text{CsSnI}_3$  in salt-derived precursor solution (left) and crystal-derived precursor solution (right).

We carefully compared nucleation processes of  $\text{CsSnI}_3$  in salt-derived precursor solution (left) and crystal-derived precursor solution (right). After 3 h, the colors of these two solutions both deepened from pale yellow to light golden, indicating the solutions were mostly saturated, and nucleation begins in the crystals-derived precursor solution. After 6 h, a mass of the  $\text{CsSnI}_3$  crystal nucleus were precipitated from the crystals-derived precursor solution while only bits of  $\text{CsSnI}_3$  crystal nucleus precipitated from the salt-derived precursor solution.

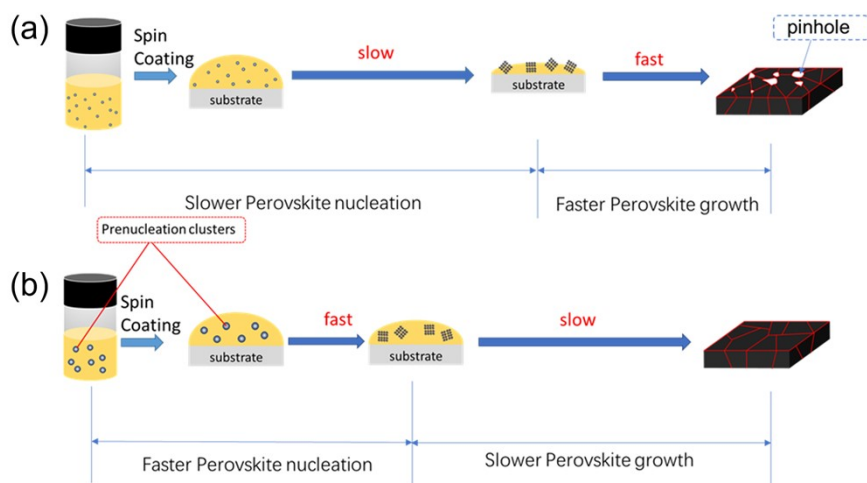

**Figure S6.** Schematic diagram of crystal nucleation and growth processes in (a) salt-derived precursor solution and (b) crystal-derived precursor solution.

To better understand the crystal nucleation and growth processes of the two different precursor solutions on PEDOT: PSS substrates. We drew a schematic diagram of the effect of pre-nucleation in the formation process of B- $\gamma$  CsSnI<sub>3</sub> films (Figures S6). The salt-derived precursor solution has a lower nucleation rate, and when nuclei are formed, there is a severe shortage of solution available for crystal growth, which then leads to numerous pinholes in the film. In contrast, a relatively high nucleation rate in crystal-derived precursor solution could balance the rate of crystal nucleation and growth, and finally form a uniform, dense, and pinhole-free CsSnI<sub>3</sub> thin film.



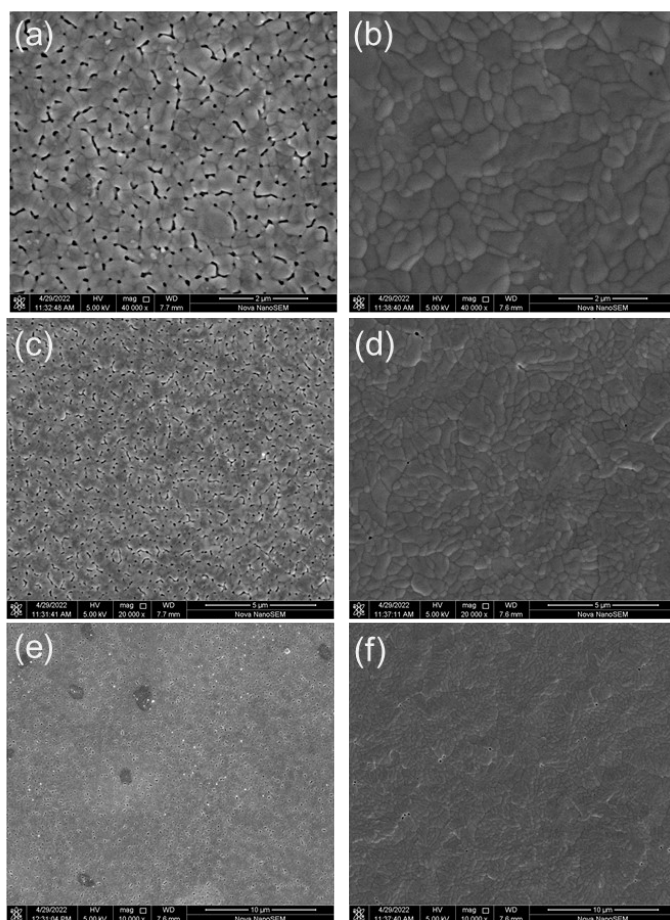

**Figure S7.** SEM images of the S-CsSnI<sub>3</sub> and C-CsSnI<sub>3</sub> films at various magnifications.

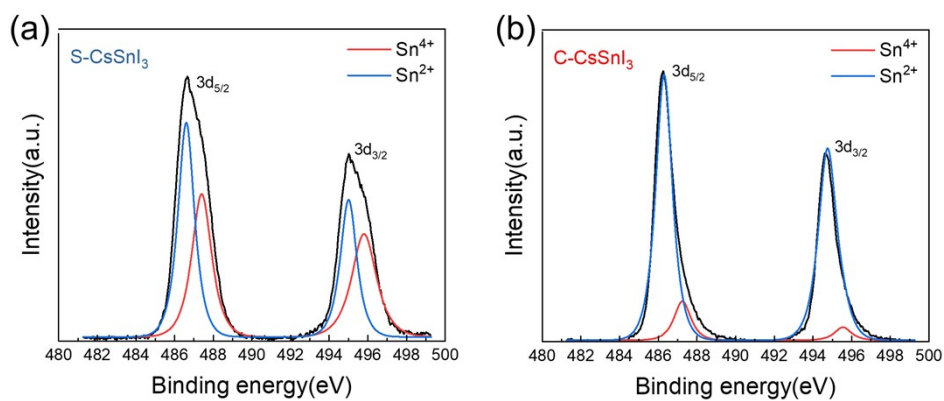

**Figure S8.** XPS characterization of (a) the S-CsSnI<sub>3</sub> and (b) C-CsSnI<sub>3</sub> thin films after 24 hours of aging in ambient air (25°C with 30% relative humidity).

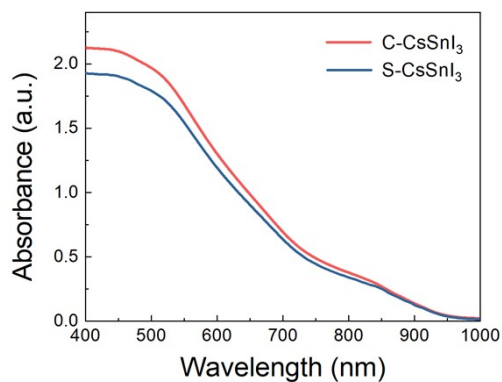

**Figure S9.** UV-visible absorption spectroscopy characterization of the S-CsSnI<sub>3</sub> and C-CsSnI<sub>3</sub> films.

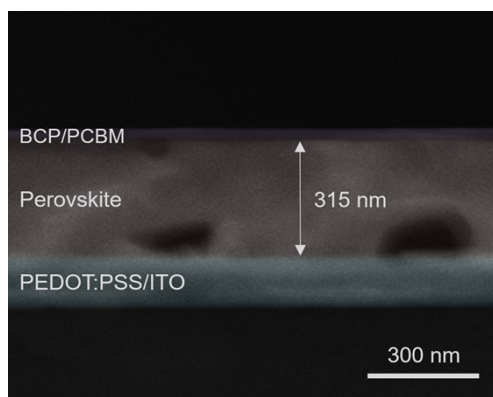

**Figure S10.** Cross-sectional SEM image of the S-CsSnI<sub>3</sub> based device.

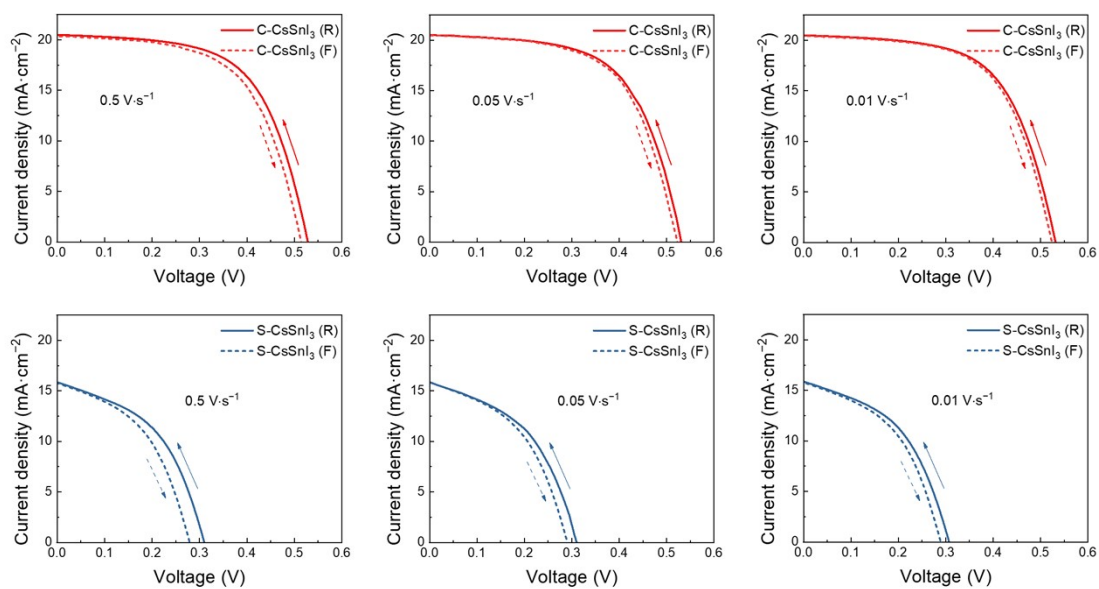

**Figure S11.**  $J$ - $V$  measurements of the C-CsSnI<sub>3</sub> and S-CsSnI<sub>3</sub> based PSCs with different scan rates in both reverse and forward scan direction.

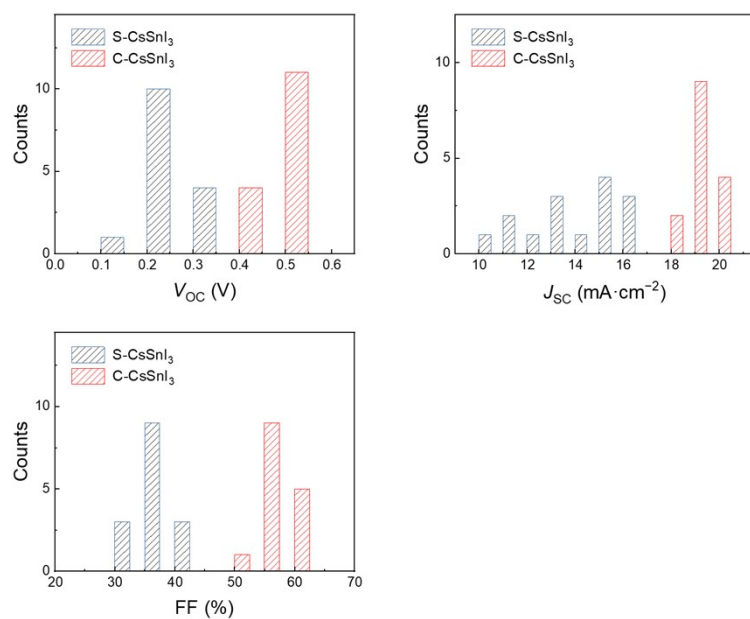

**Figure S12.**  $V_{OC}$ ,  $J_{SC}$  and FF distribution of the C-CsSnI<sub>3</sub> and S-CsSnI<sub>3</sub> based PSCs obtained from current density-voltage measurements.

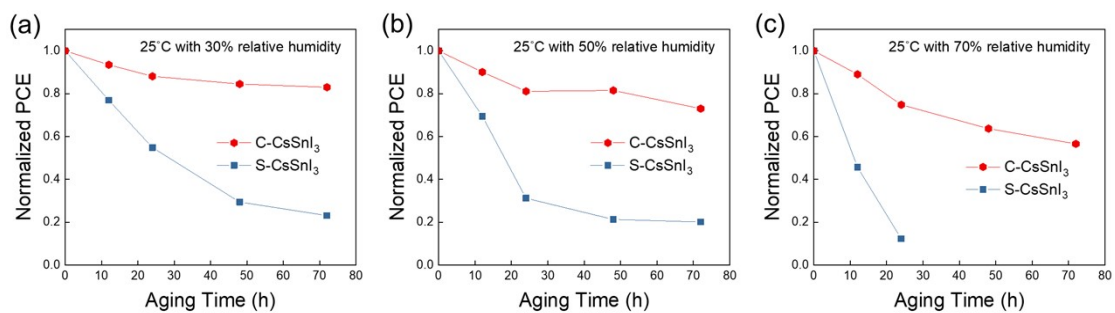

**Figure S13.** Stability tests of the unencapsulated PSCs under different relative humidity conditions.

**Table S1.** Analytical parameters of the B- $\gamma$  CsSnI<sub>3</sub> single crystal.

| Table 1 Crystal data and structure refinement for CsSnI <sub>3</sub> |                                                              |
|----------------------------------------------------------------------|--------------------------------------------------------------|
| Identification code                                                  | CsSnI <sub>3</sub>                                           |
| Empirical formula                                                    | CsSnI <sub>3</sub>                                           |
| Formula weight                                                       | 421.53                                                       |
| Temperature/K                                                        | 293.2(2)                                                     |
| Crystal system                                                       | orthorhombic                                                 |
| Space group                                                          | Pnma                                                         |
| a/Å                                                                  | 8.6944(5)                                                    |
| b/Å                                                                  | 12.3862(7)                                                   |
| c/Å                                                                  | 8.6562(9)                                                    |
| $\alpha$ /°                                                          | 90                                                           |
| $\beta$ /°                                                           | 90                                                           |
| $\gamma$ /°                                                          | 90                                                           |
| Volume/Å <sup>3</sup>                                                | 932.19(12)                                                   |
| Z                                                                    | 1                                                            |
| $\rho$ calc/g/cm <sup>3</sup>                                        | 0.751                                                        |
| $\mu$ /mm <sup>-1</sup>                                              | 19.295                                                       |
| F(000)                                                               | 180.0                                                        |
| Crystal size/mm <sup>3</sup>                                         | 0.12 × 0.07 × 0.05                                           |
| Radiation                                                            | CuK $\alpha$ ( $\lambda$ = 1.54184)                          |
| 2 $\theta$ range for data collection/°                               | 12.476 to 147.644                                            |
| Index ranges                                                         | -10 ≤ h ≤ 10, -15 ≤ k ≤ 15, -7 ≤ l ≤ 9                       |
| Reflections collected                                                | 5170                                                         |
| Independent reflections                                              | 867 [R <sub>int</sub> = 0.1273, R <sub>sigma</sub> = 0.0762] |
| Data/restraints/parameters                                           | 867/0/28                                                     |
| Goodness-of-fit on F <sup>2</sup>                                    | 1.653                                                        |
| Final R indexes [ $I$ >= 2 $\sigma$ ( $I$ )]                         | R1 = 0.1282, wR2 = 0.3967                                    |
| Final R indexes [all data]                                           | R1 = 0.1358, wR2 = 0.4023                                    |
| Largest diff. peak/hole / e Å <sup>-3</sup>                          | 5.98/- 2.93                                                  |

**Table S2.** Fitting parameters of PL decay lifetime of the C-CsSnI<sub>3</sub> and S-CsSnI<sub>3</sub> films.

|                      | $\tau_1$ (ns) | $A_1$ | $\tau_2$ (ns) | $A_2$ | $\tau_{\text{average}}$ (ns) |
|----------------------|---------------|-------|---------------|-------|------------------------------|
| S-CsSnI <sub>3</sub> | 0.19          | 76.7  | 7.22          | 23.3  | 1.83 ns                      |
| C-CsSnI <sub>3</sub> | 0.43          | 61.3  | 13.87         | 38.7  | 5.63 ns                      |

**Table S3.** Photovoltaic parameters of the optimized C-CsSnI<sub>3</sub> and S-CsSnI<sub>3</sub> PSCs.

|                      | $V_{\text{OC}}$ (V) | $J_{\text{SC}}$ (mA cm <sup>-2</sup> ) | FF (%) | PCE (%) |
|----------------------|---------------------|----------------------------------------|--------|---------|
| S-CsSnI <sub>3</sub> | 0.31                | 15.84                                  | 46.1   | 2.26    |
| C-CsSnI <sub>3</sub> | 0.53                | 20.50                                  | 60.1   | 6.53    |

**Table S4.** Photovoltaic parameters and hysteresis index data of the C-CsSnI<sub>3</sub> and S-CsSnI<sub>3</sub> based PSCs with different scan rates.

|                          | Scan rate                  | Scan direction | $V_{OC}$ (V) | $J_{SC}$ (mA cm <sup>-2</sup> ) | FF (%) | PCE (%) | Hysteresis index |
|--------------------------|----------------------------|----------------|--------------|---------------------------------|--------|---------|------------------|
| C-<br>CsSnI <sub>3</sub> | 0.5<br>mV s <sup>-1</sup>  | Reverse        | 0.53         | 20.49                           | 60.4   | 6.56    | 1.9              |
|                          |                            | Forward        | 0.51         | 20.34                           | 60.1   | 6.23    |                  |
|                          | 0.05<br>mV s <sup>-1</sup> | Reverse        | 0.53         | 20.50                           | 60.1   | 6.53    | 1.3              |
|                          |                            | Forward        | 0.52         | 20.46                           | 60.9   | 6.48    |                  |
|                          | 0.01<br>mV s <sup>-1</sup> | Reverse        | 0.53         | 20.48                           | 60.2   | 6.53    | 0.9              |
|                          |                            | Forward        | 0.52         | 20.44                           | 61.1   | 6.50    |                  |
| S-<br>CsSnI <sub>3</sub> | 0.5<br>mV s <sup>-1</sup>  | Reverse        | 0.31         | 15.83                           | 46.3   | 2.28    | 6.3              |
|                          |                            | Forward        | 0.28         | 15.75                           | 45.5   | 2.01    |                  |
|                          | 0.05<br>mV s <sup>-1</sup> | Reverse        | 0.31         | 15.84                           | 46.1   | 2.26    | 3.8              |
|                          |                            | Forward        | 0.29         | 15.80                           | 45.6   | 2.09    |                  |
|                          | 0.01<br>mV s <sup>-1</sup> | Reverse        | 0.31         | 15.83                           | 46.0   | 2.26    | 3.1              |
|                          |                            | Forward        | 0.29         | 15.77                           | 46.0   | 2.10    |                  |

The hysteresis index (HI) of the devices were calculated by the following equation:

$$HI = [J_{RS} (0.8V_{OC}) - J_{FS} (0.8V_{OC})]/J_{RS} (0.8V_{OC})$$

Where  $J_{RS} (0.8V_{OC})$  and  $J_{FS} (0.8V_{OC})$  on behalf of the  $J_{SC}$  at 80% of  $V_{OC}$  for the reverse scan and forward scan, respectively.

**Table S5.** Photovoltaic parameters of the S-CsSnI<sub>3</sub> based PSCs.

|    | $V_{OC}$ (V) | $J_{SC}$ (mA cm <sup>-2</sup> ) | FF (%) | PCE (%) |
|----|--------------|---------------------------------|--------|---------|
| 1  | 0.30         | 13.96                           | 45.8   | 1.92    |
| 2  | 0.29         | 14.96                           | 42.8   | 1.86    |
| 3  | 0.19         | 12.36                           | 38.1   | 0.89    |
| 4  | 0.31         | 15.74                           | 41.1   | 2.01    |
| 5  | 0.30         | 16.31                           | 41.5   | 1.94    |
| 6  | 0.29         | 16.453                          | 44.6   | 2.13    |
| 7  | 0.26         | 15.67                           | 43.9   | 1.79    |
| 8  | 0.28         | 16.92                           | 45.2   | 2.14    |
| 9  | 0.20         | 11.24                           | 38.6   | 0.87    |
| 10 | 0.23         | 10.36                           | 41.1   | 0.98    |
| 11 | 0.21         | 11.23                           | 39.6   | 0.93    |
| 12 | 0.24         | 13.21                           | 40.2   | 1.27    |
| 13 | 0.28         | 15.68                           | 43.6   | 1.91    |
| 14 | 0.23         | 13.53                           | 42.9   | 1.34    |
| 15 | 0.31         | 15.84                           | 46.1   | 2.26    |



**Table S6.** Photovoltaic parameters of the C-CsSnI<sub>3</sub> based PSCs.

|    | $V_{OC}$ (V) | $J_{SC}$ (mA cm <sup>-2</sup> ) | FF (%) | PCE (%) |
|----|--------------|---------------------------------|--------|---------|
| 1  | 0.52         | 20.09                           | 60.7   | 6.34    |
| 2  | 0.51         | 19.92                           | 62.1   | 6.31    |
| 3  | 0.49         | 19.43                           | 55.8   | 5.31    |
| 4  | 0.53         | 20.50                           | 60.1   | 6.53    |
| 5  | 0.52         | 19.14                           | 61.2   | 6.09    |
| 6  | 0.51         | 19.86                           | 56.9   | 5.76    |
| 7  | 0.47         | 18.84                           | 54.5   | 4.83    |
| 8  | 0.50         | 20.21                           | 59.2   | 5.98    |
| 9  | 0.44         | 19.32                           | 58.2   | 4.95    |
| 10 | 0.49         | 19.36                           | 55.2   | 5.24    |
| 11 | 0.54         | 19.66                           | 59.2   | 6.28    |
| 12 | 0.53         | 19.14                           | 60.2   | 6.11    |
| 13 | 0.51         | 18.80                           | 58.4   | 5.60    |
| 14 | 0.50         | 19.83                           | 59.9   | 5.94    |
| 15 | 0.51         | 20.55                           | 57.8   | 6.06    |

## References

1. I. Chung, J. Song, J. Im, J. Androulakis, C. Malliakas, H. Li, A. Freeman, J. Kenney and M. Kanatzidis, *J. Am. Chem. Soc.*, 2012, 134, 8579–8587.
